# Supplementary material
Source: Springer Nature journal article supplement (https://www.springermedizin.de/resource/supplementary/13550_2012_123_MOESM2_ESM.pdf/9687646)
Supplement: MOESM2 [file 9687646]

Additional file 2. Biodistribution of <sup>131</sup>I-labeled chimeric antibody 14C5 and fragments (%ID/g tissue) in athymic mice bearing an A549 tumor. Data are expressed as mean ± S.D. (n=4-5), (nd; not determined)

| Ab derivative         | Tissue and tumor-to-blood ratio | Time post injection (h) |             |            |            |           |            |            |            |            |           |
|-----------------------|---------------------------------|-------------------------|-------------|------------|------------|-----------|------------|------------|------------|------------|-----------|
|                       |                                 | 0.02                    | 1           | 3          | 6          | 8         | 10         | 24         | 48         | 72         | 168       |
| ChFab                 | Tumor                           | 0.99±0.29               | 2.51±0.46   | 1.73±0.51  | 1.26±0.10  | nd        | nd         | 0.63±0.25  | 0.23±0.03  | nd         | nd        |
|                       | Blood                           | 29.15±1.38              | 6.14±2.83   | 2.70±1.06  | 1.50±0.45  |           |            | 0.84±0.50  | 0.28±0.15  |            |           |
|                       | Lung                            | 8.31±1.20               | 2.61±0.93   | 1.27±0.45  | 0.72±0.13  |           |            | 0.39±0.28  | 0.15±0.06  |            |           |
|                       | Stomach                         | 1.20±0.19               | 5.92±1.94   | 3.56±1.72  | 1.90±1.10  |           |            | 0.32±0.26  | 0.08±0.03  |            |           |
|                       | Spleen                          | 4.41±1.09               | 2.12±0.86   | 0.90±0.34  | 0.51±0.25  |           |            | 0.31±0.21  | 0.09±0.07  |            |           |
|                       | Liver                           | 10.64±1.75              | 2.22±0.82   | 0.90±0.32  | 0.49±0.15  |           |            | 0.34±0.16  | 0.16±0.11  |            |           |
|                       | Kidney                          | 19.50±3.70              | 42.54±10.09 | 5.03±1.97  | 6.48±5.00  |           |            | 1.25±0.47  | 0.64±0.28  |            |           |
|                       | Small intestine                 | 0.85±0.09               | 1.42±0.26   | 0.71±0.17  | 0.36±0.02  |           |            | 0.08±0.05  | 0.03±0.01  |            |           |
|                       | Large intestine                 | 0.37±0.09               | 0.60±0.18   | 0.67±0.16  | 0.40±0.08  |           |            | 0.08±0.05  | 0.04±0.02  |            |           |
|                       | Tumor-to-blood                  | 0.03±0.01               | 0.48±0.21   | 0.67±0.14  | 0.88±0.21  |           |            | 0.87±0.30  | 1.05±0.63  |            |           |
| ChF(ab') <sub>2</sub> | Tumor                           | 2.20±0.32               | 2.05±0.16   | 4.72±1.81  | 4.30±1.86  | 5.73±1.62 | 2.43±1.44  | 2.86±1.72  | 1.94±0.95  | 0.28±0.13  | nd        |
|                       | Blood                           | 24.08±3.97              | 19.74±4.99  | 17.35±4.08 | 11.67±3.84 | 9.97±3.29 | 6.74±1.72  | 1.95±1.18  | 0.70±0.34  | 0.17±0.14  |           |
|                       | Lung                            | 13.71±6.51              | 7.18±1.62   | 6.28±2.45  | 7.44±3.65  | 6.65±1.72 | 13.16±0.10 | 0.95±0.55  | 1.43±0.70  | 0.09±0.03  |           |
|                       | Stomach                         | 1.64±1.36               | 6.29±2.58   | 6.24±3.41  | 6.00±2.55  | 4.63±2.49 | 5.37±2.97  | 0.88±0.56  | 0.38±0.20  | 0.14±0.11  |           |
|                       | Spleen                          | 2.66±1.44               | 2.88±0.96   | 2.62±1.88  | 3.00±1.37  | 2.16±0.36 | 2.06±0.01  | 0.71±0.44  | 0.32±0.14  | 0.13±0.02  |           |
|                       | Liver                           | 7.59±3.93               | 4.82±0.74   | 4.87±1.04  | 3.25±0.90  | 2.51±0.44 | 2.33±0.01  | 0.65±0.13  | 0.38±0.11  | 0.16±0.03  |           |
|                       | Kidney                          | 10.44±4.44              | 14.19±3.27  | 6.62±3.92  | 3.96±0.36  | 6.59±0.99 | 5.13±0.87  | 1.38±0.76  | 0.69±0.27  | 0.30±0.17  |           |
|                       | Small intestine                 | 1.18±1.12               | 3.97±3.03   | 5.03±2.92  | 1.82±0.17  | 1.43±0.64 | 1.25±0.36  | 0.28±0.07  | 0.17±0.08  | 0.07±0.01  |           |
|                       | Large intestine                 | 0.49±0.30               | 0.51±0.31   | 1.88±0.30  | 1.52±0.48  | 1.47±0.71 | 1.34±0.51  | 0.32±0.06  | 0.22±0.11  | 0.06±0.03  |           |
|                       | Tumor-to-blood                  | 0.09±0.03               | 0.46±0.33   | 0.27±0.12  | 0.37±0.23  | 0.58±0.03 | 0.34±0.12  | 1.47±0.69  | 2.79±1.24  | 1.99±0.99  |           |
| ChAb                  | Tumor                           | nd                      | 5.97±1.74   | 8.24±1.70  | 6.58±0.67  | nd        | nd         | 11.56±3.88 | 8.69±4.01  | 11.12±5.51 | 6.07±0.71 |
|                       | Blood                           |                         | 44.27±6.53  | 27.74±1.52 | 15.79±1.08 |           |            | 14.33±2.34 | 12.49±4.48 | 11.50±4.19 | 7.46±1.29 |
|                       | Lung                            |                         | 13.99±3.84  | 10.75±3.00 | 5.86±1.58  |           |            | 6.73±1.66  | 5.00±1.89  | 4.79±2.22  | 2.34±0.39 |
|                       | Stomach                         |                         | 4.30±1.33   | 6.58±3.68  | 2.73±0.74  |           |            | 2.60±0.66  | 2.05±1.03  | 1.66±0.69  | 0.76±0.27 |
|                       | Spleen                          |                         | 12.87±2.80  | 7.82±2.04  | 5.09±0.72  |           |            | 7.37±2.40  | 4.10±1.92  | 2.98±1.26  | 1.63±0.42 |
|                       | Liver                           |                         | 11.74±3.28  | 7.88±2.45  | 4.99±1.97  |           |            | 3.84±1.15  | 3.44±2.12  | 2.67±1.35  | 1.44±0.17 |
|                       | Kidney                          |                         | 14.36±3.84  | 8.64±2.26  | 4.85±0.79  |           |            | 4.36±1.21  | 3.65±1.46  | 3.05±1.01  | 2.15±0.30 |
|                       | Small intestine                 |                         | 3.26±1.03   | 4.13±0.84  | 1.46±0.38  |           |            | 1.22±0.53  | 0.94±0.53  | 0.76±0.29  | 0.51±0.05 |
|                       | Large intestine                 |                         | 1.18±0.11   | 2.04±0.41  | 1.61±0.40  |           |            | 0.73±0.27  | 0.69±0.59  | 0.49±0.13  | 0.29±0.04 |
|                       | Tumor-to-blood                  |                         | 0.13±0.03   | 0.30±0.05  | 0.42±0.02  |           |            | 0.80±0.17  | 0.71±0.19  | 0.94±0.35  | 0.83±0.13 |
